# Supplementary material
Source: PubMed Central journal article supplement (PMC5030098)
Supplement: NIHMS3957-supplement-supplement.pdf [file NIHMS3957-supplement-supplement.pdf]

**Supplementary Figure 1** Responsiveness of a panel of cancer and normal cells to the combinatorial treatment of SMC and oncolytic virus.

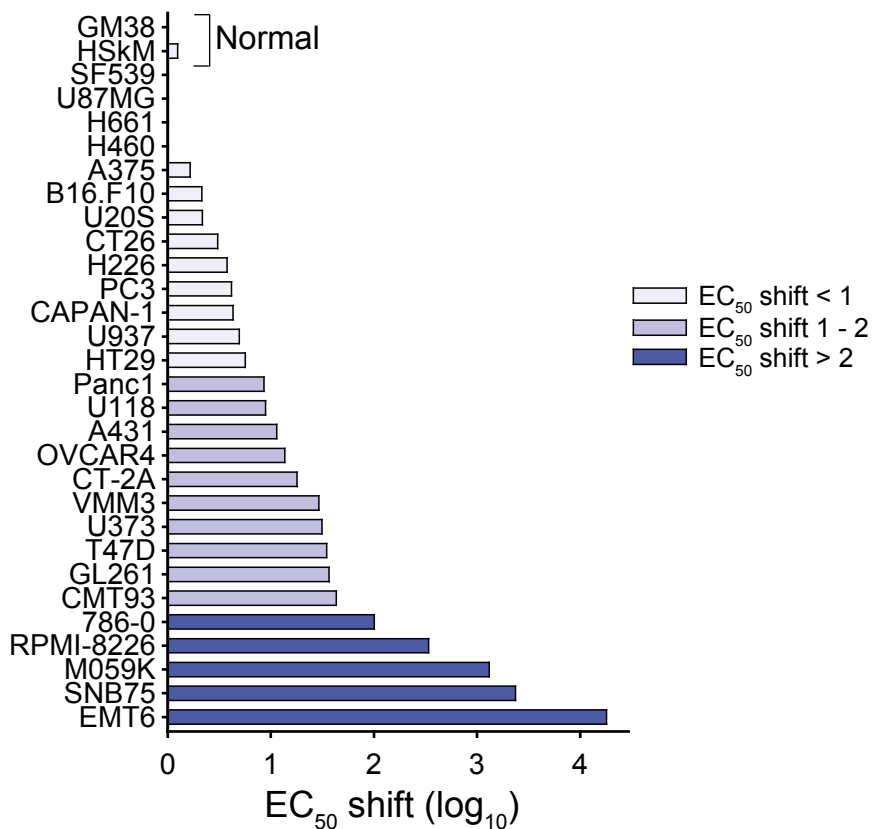

The indicated cancer cell lines (n = 28) and non-cancer human cells (primary human skeletal muscle (HSkM) and human fibroblasts (GM38)) were treated with 5  $\mu$ M LCL161 and increasing VSV $\Delta$ 51 for 48 hr. The dose required to yield 50% viable cells in the presence in SMC versus vehicle was determined using nonlinear regression and plotted as a log<sub>10</sub> EC<sub>50</sub> shift toward increasing sensitivity. Representative data from at least two independent experiments using biological replicates (n = 3).

**Supplementary Figure 2** SMC and oncolytic virus co-treatment is highly synergistic in cancer cells.

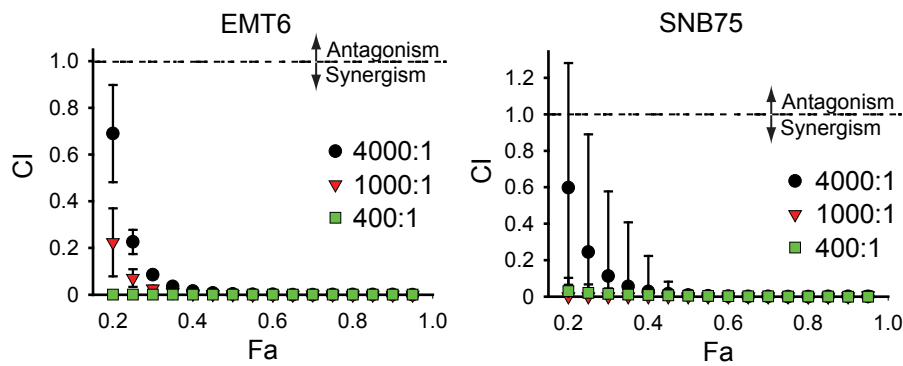

Alamar blue viability of cells treated with indicated dilutions of a fixed ratio combination mixture of VSV $\Delta$ 51 and LCL161 (PFU :  $\mu$ M LCL161) at 48 hr post-treatment. Combination indexes (CI) were calculated according to Chou and Talalay<sup>47</sup> using Calcsyn. Plots represent the algebraic estimate of the CI in function of the fraction of cells affected (Fa). Error bars, mean  $\pm$  s.e.m. Representative data from three independent experiments using biological replicates (n = 3).

**Supplementary Figure 3** Monovalent and bivalent SMCs synergize with oncolytic viruses to cause cancer cell death.

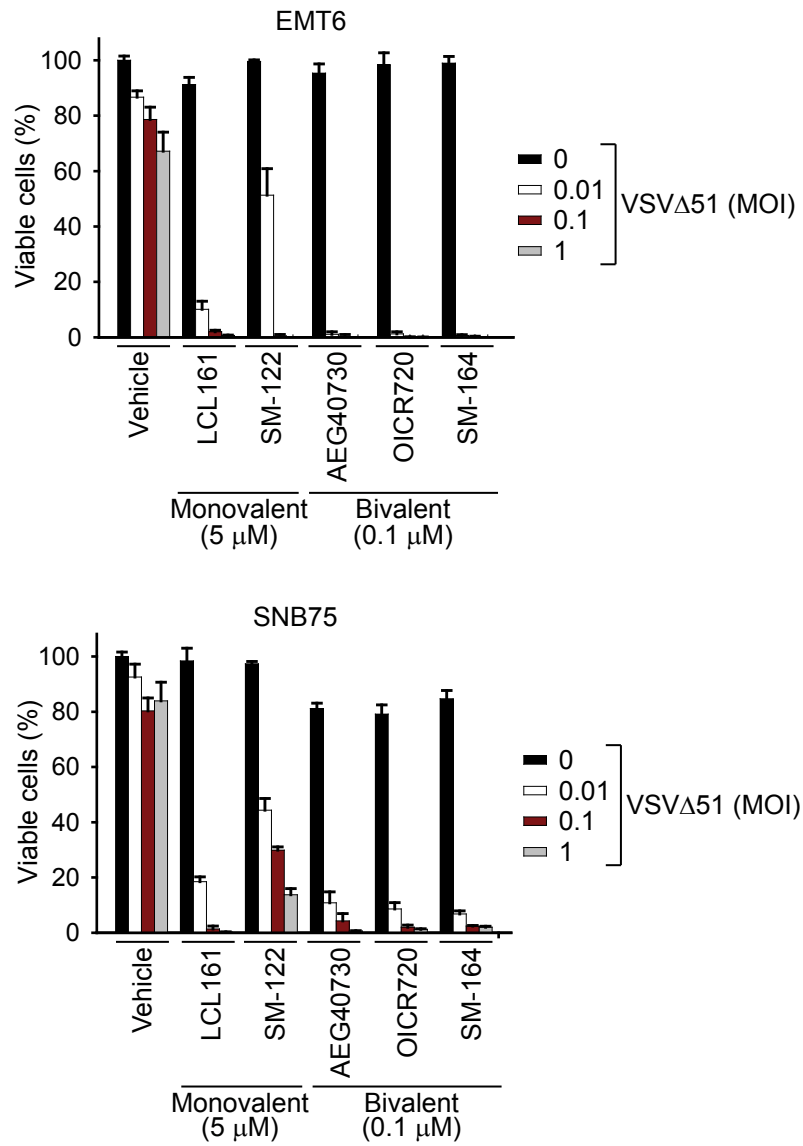

Alamar blue viability assay of cells treated with 5 μM monovalent SMCs (LCL161, SM-122) or 0.1 μM bivalent SMCs (AEG40730, OICR720, SM-164) and VSVΔ51 at differing MOIs. Cells were treated for 48 hr. Error bars, mean ± s.d. Representative data from three independent experiments using biological replicates (n = 3).

**Supplementary Figure 4** SMC-mediated cancer cell death is potentiated by oncolytic rhabdoviruses.

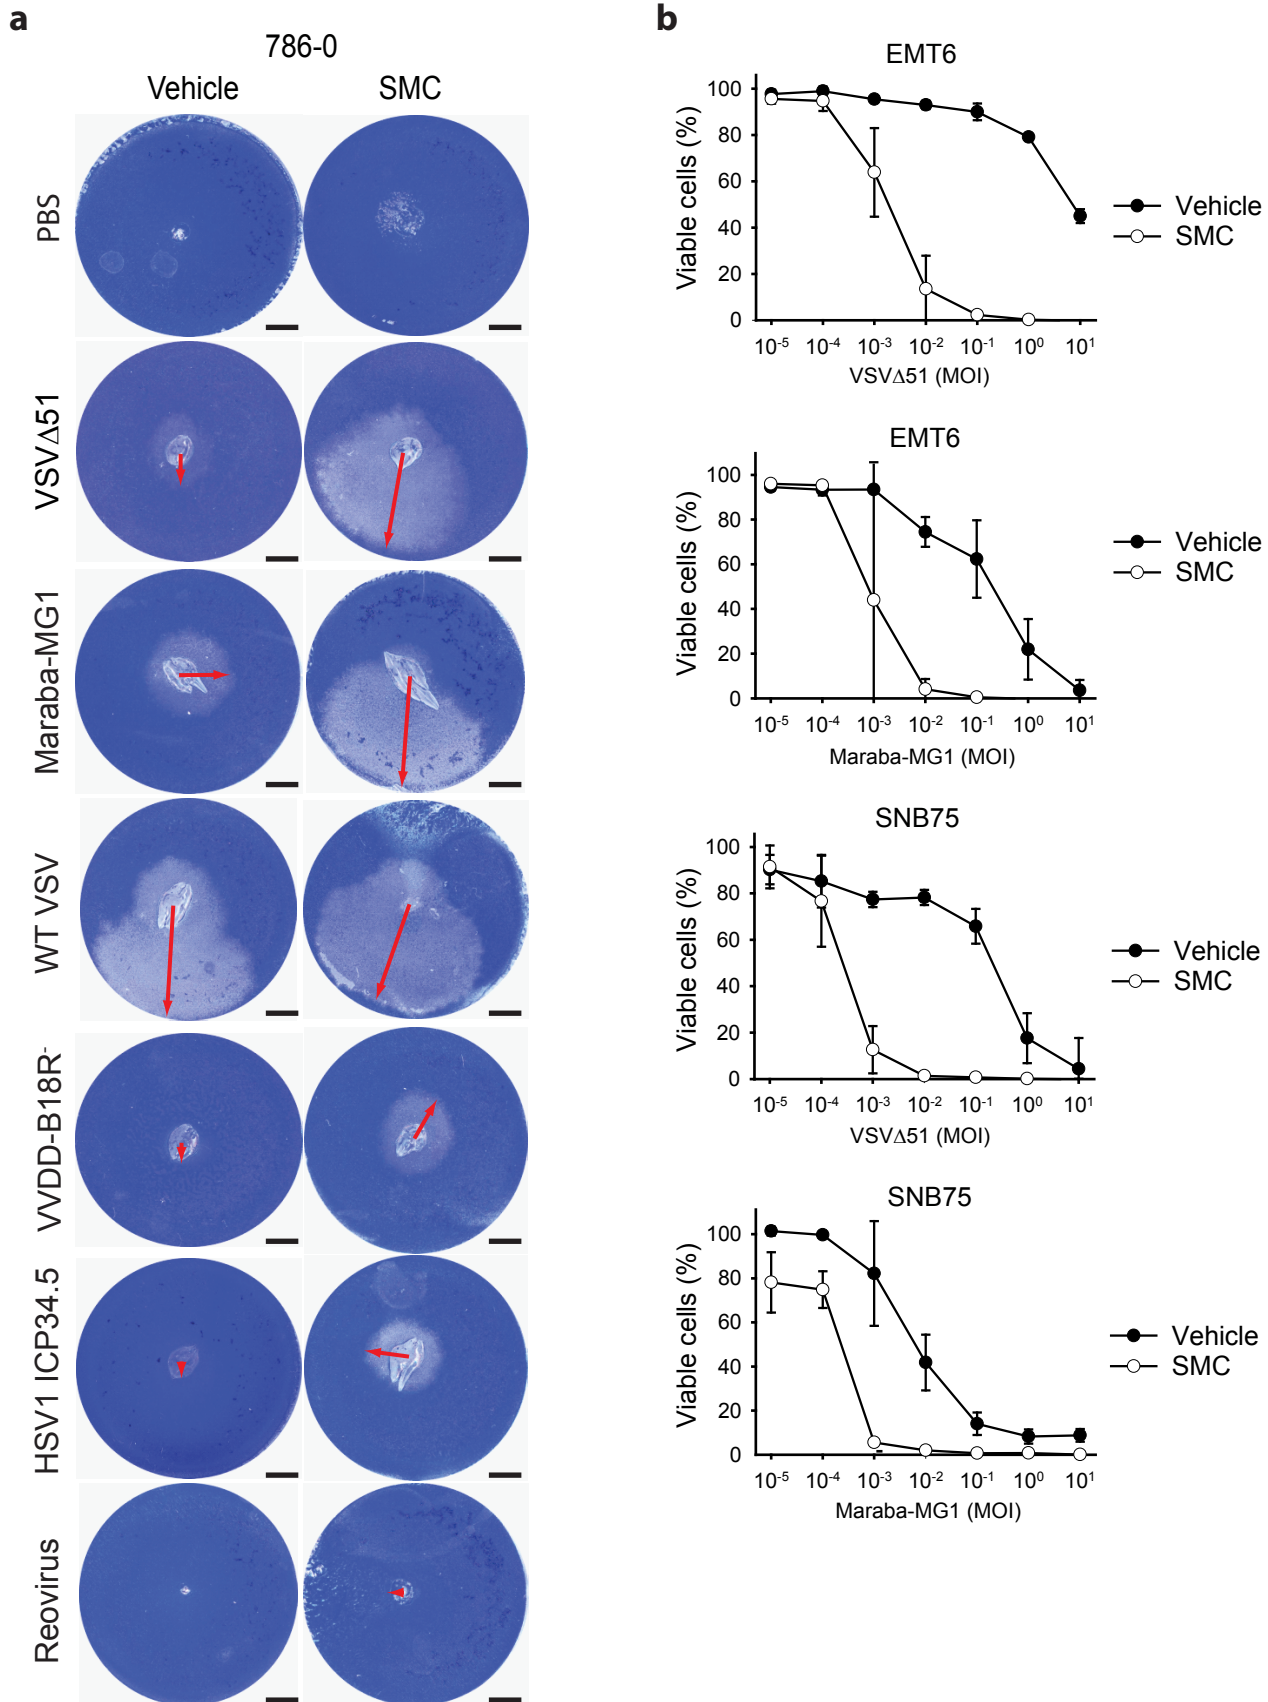

**a**, Virus spreading assay of cells that were overlaid with 0.7% agarose in the presence of vehicle or 5  $\mu$ M LCL161 and 500 PFU of the indicated viruses were dispensed in to the middle of the well. Cytotoxicity was assessed 96 hr post-treatment by crystal violet staining. Arrow denotes extension of the cell death zone from the origin of OV infection. Scale bar, 5 mm. **b**, Alamar blue viability of cells treated with 5  $\mu$ M LCL161 and increasing MOIs of VSVΔ51 or Maraba-MG1 at 48 hr post-treatment. Error bars, mean  $\pm$  s.d. Representative data from two independent experiments using biological replicates (n = 3).

**Supplementary Figure 5** cIAP1, cIAP2 and XIAP cooperatively protect cancer cells from oncolytic virus induced cell death.

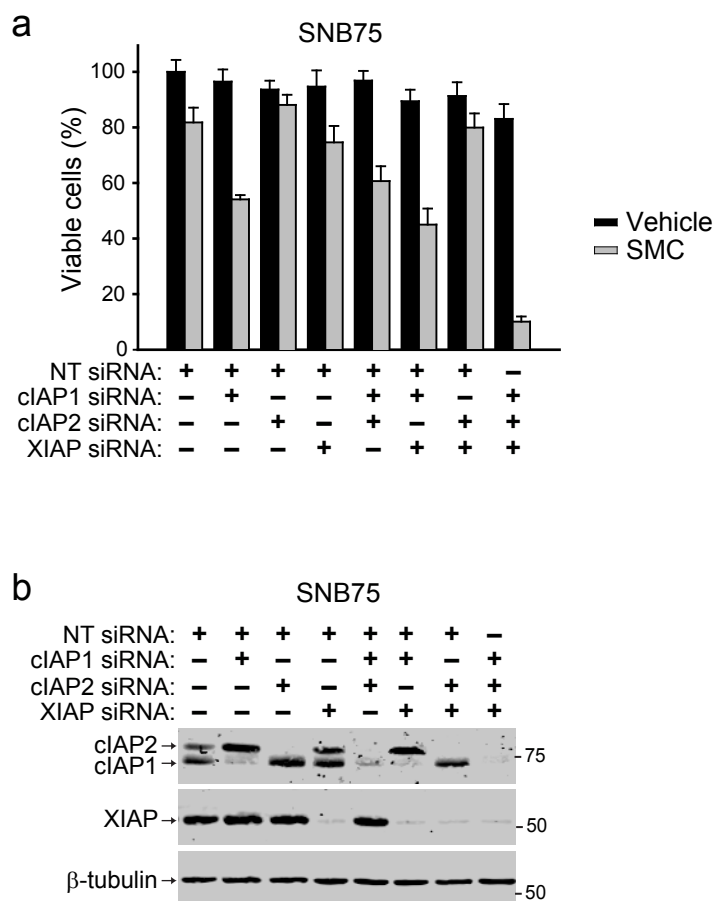

**a**, Alamar blue viability of cells transfected with nontargeting (NT) siRNA or siRNA targeting cIAP1, cIAP2 or XIAP, and subsequently treated with 5  $\mu$ M LCL161 and 0.1 MOI VSV $\Delta$ 51 for 48 hr. Error bars, mean  $\pm$  s.d. Representative data from three independent experiments using biological replicates (n = 3). **b**, Representative siRNA efficacy Western blots for the experiment depicted in (a) are displayed.

Supplementary Figure 6 Images used for superimposed images depicted in Fig. 1g.

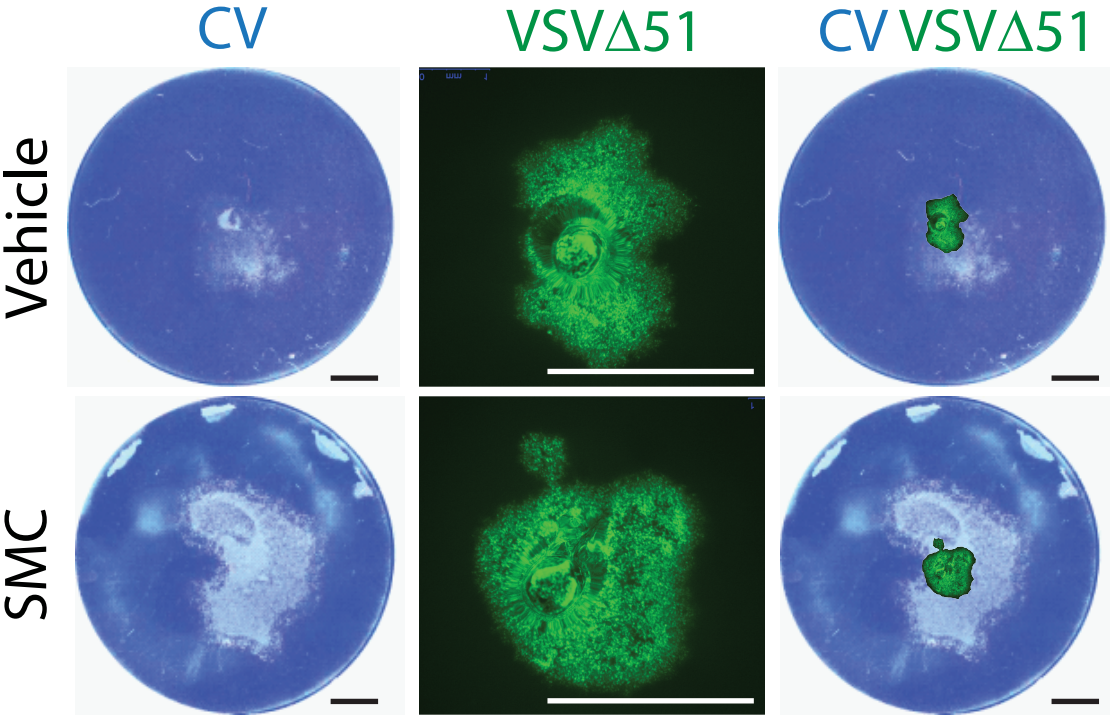

Cells were overlaid with agarose media containing 5  $\mu$ M LCL161, inoculated with 500 PFU of VSVΔ51-GFP in the middle of the well, and infectivity measured by fluorescence and cytotoxicity was denoted by crystal violet (CV) staining at 96 hr post-treatment. Scale bar, 5 mm.

**Supplementary Figure 7** SMC treatment does not affect oncolytic virus distribution or replication in vivo.

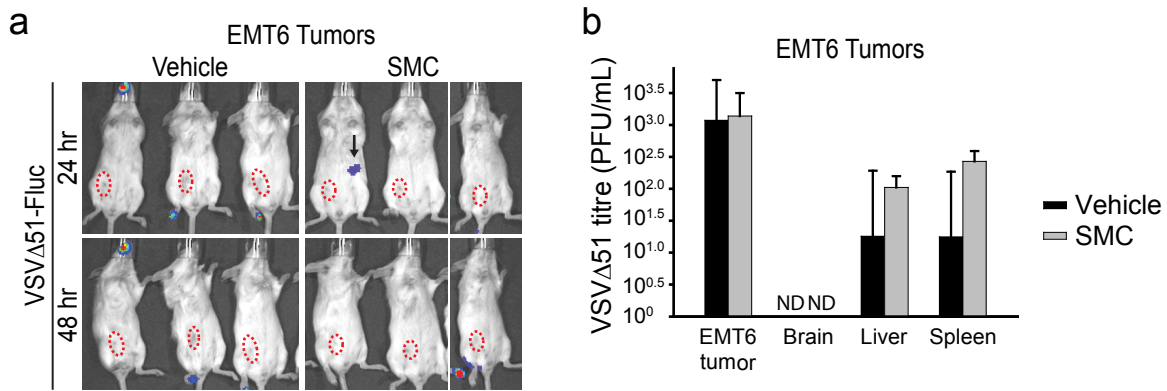

**a**, EMT6-bearing mice were treated with 50 mg/kg LCL161 (per os) and  $5 \times 10^8$  PFU firefly luciferase tagged VSVΔ51 (VSVΔ51-Fluc) via i.v. injection. Virus distribution and replication was imaged at 24 and 48 hrs using the IVIS. Red outline denotes region of tumours. Representative data from two independent experiments. Arrow indicates spleen infected with VSVΔ51-Fluc. **b**, Tumors and tissues at 48 hr post-infection were homogenized and virus titrations were performed for each group. Error bars, mean  $\pm$  s.e.m.

**Supplementary Figure 8** Verification of siRNA-mediated knockdown.

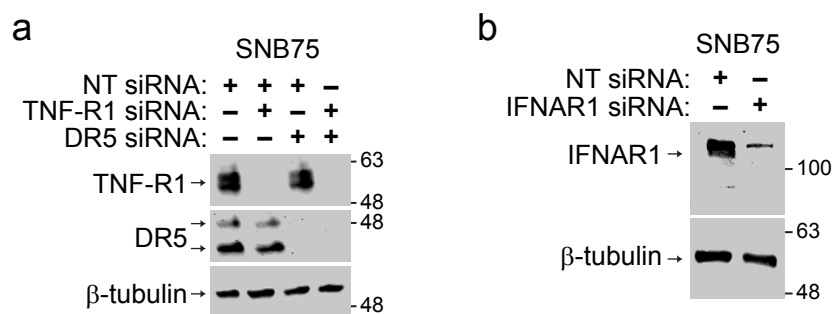

Verification of siRNA-mediated knockdown of non-targeting (NT), TNFR1, DR5 and IFNAR1 by Western blotting from Fig. 3a (a) and Fig. 3b (b).



**Supplementary Figure 9 SMCs synergizes with oncolytic viruses to induce caspase-8- and RIP-1-dependent apoptosis in cancer cells.**

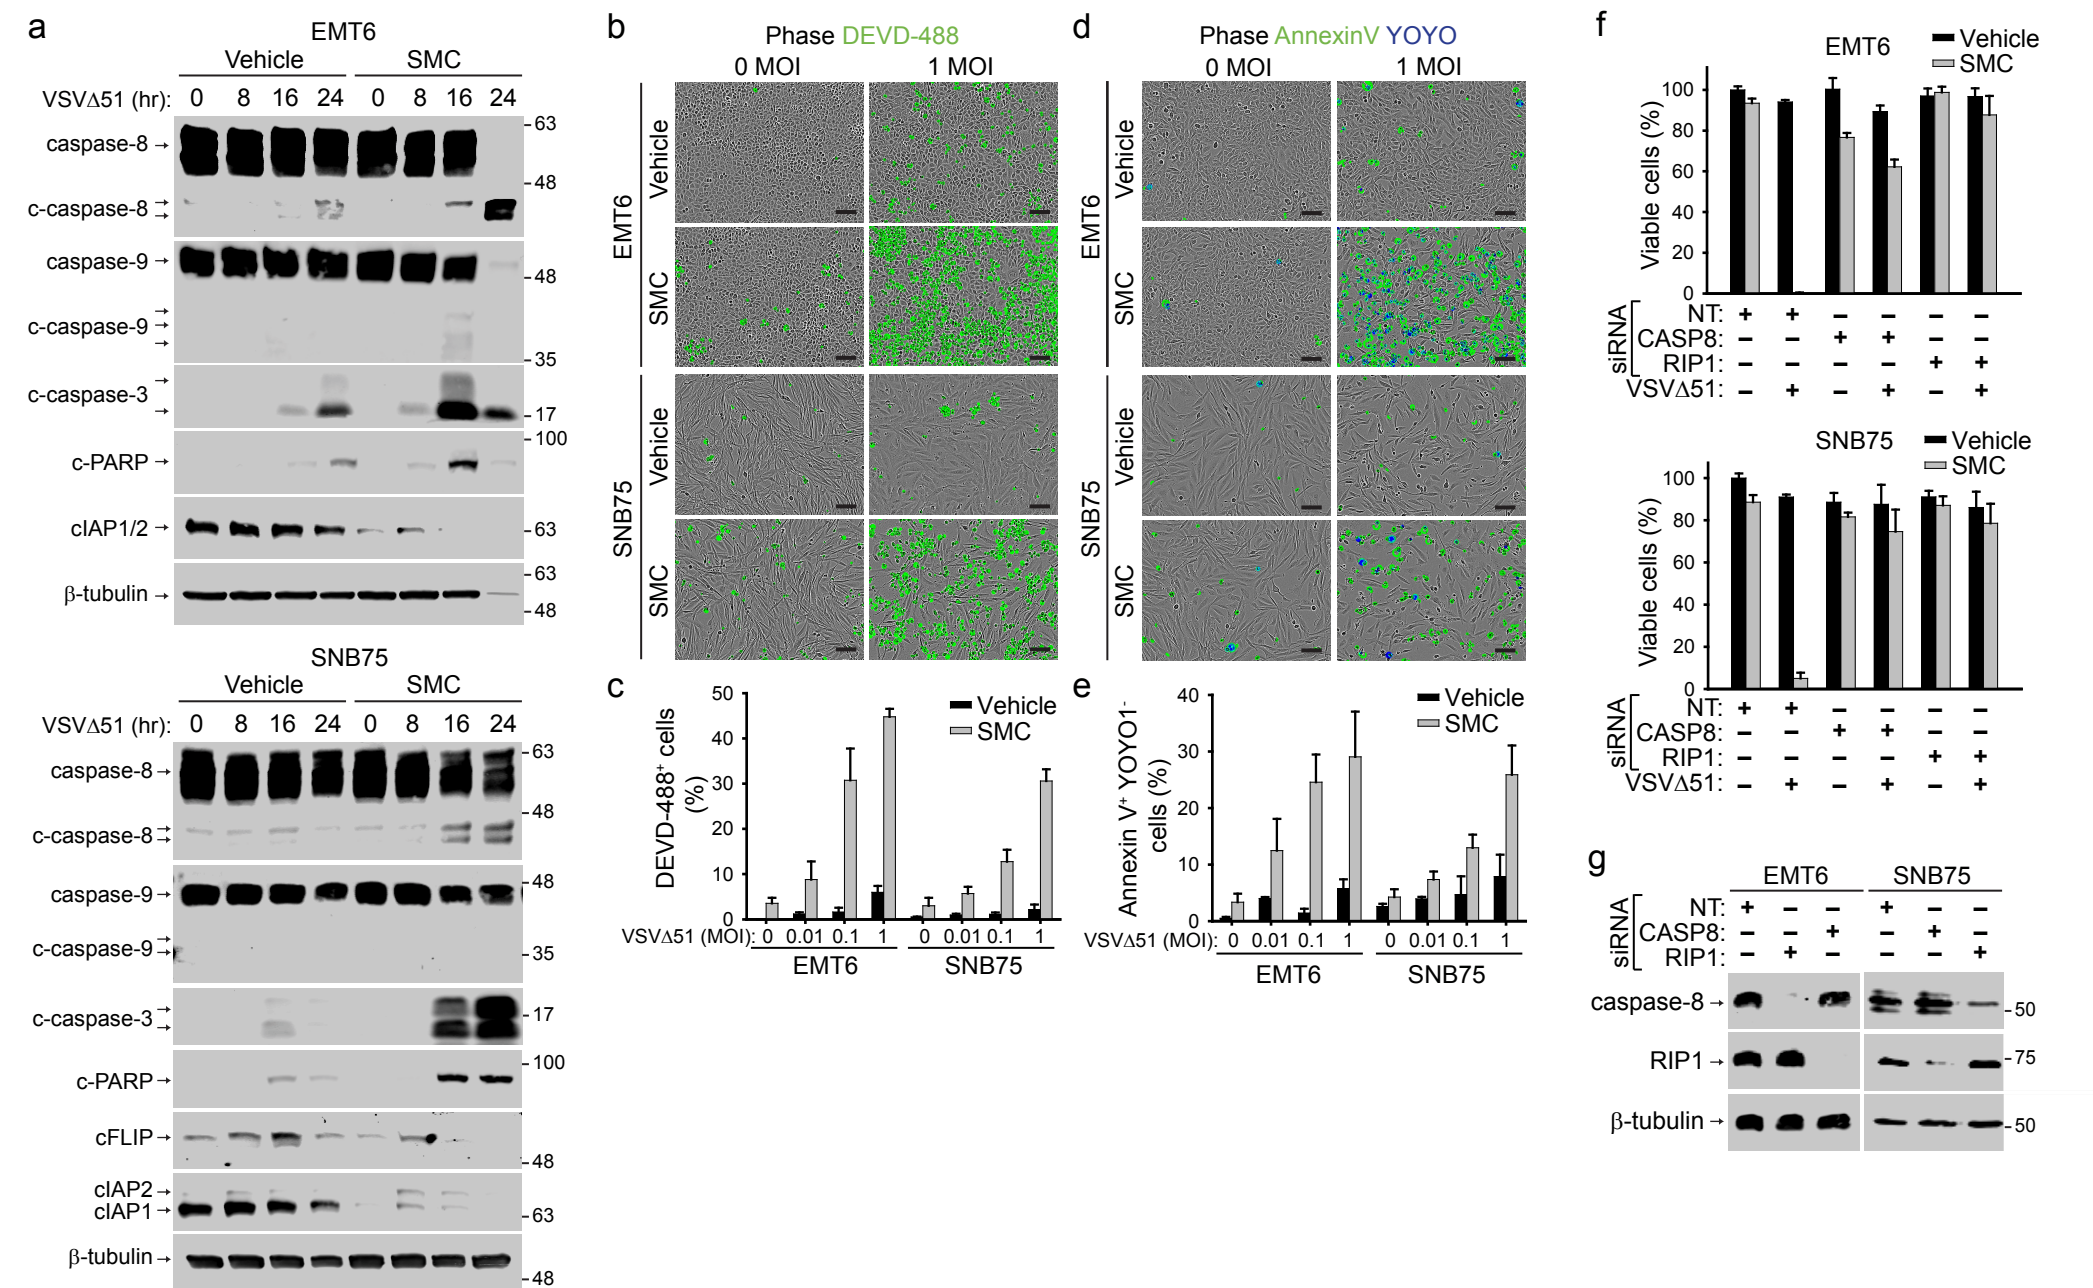

**a**, Western blotting for caspase and PARP activation was conducted on cells pretreated with 5 μM LCL161 (2 hr) and subsequently treated with 1 MOI of VSVΔ51. **b**, Micrographs of caspase activation were acquired with cells that were cotreated with 5 μM LCL161 and VSVΔ51 in the presence of the caspase-3/7 substrate DEVD-488 for 24 hr. Scale bar, 100 μm. **c**, The proportion of DEVD-488-positive cells from (b) was plotted (n = 12). Error bars, mean ± s.d. **d**, Apoptosis was assessed by micrographs of translocated phosphatidyl serine (Annexin V-CF594, green) and loss of plasma membrane integrity (YOYO-1, blue) in cells treated with 5 μM LCL161 and VSVΔ51 for 24 hr. Scale bar, 100 μm. **e**, The proportion of Annexin V-CF594-positive and YOYO-1-negative apoptotic cells from (d) was plotted (n = 9). Error bars, mean ± s.d. **f**, Alamar blue viability of cells transfected for 48 hr with nontargeting (NT) siRNA or siRNA targeting caspase-8 or RIP1, and subsequently treated with 5 μM LCL161 and 0.1 MOI of VSVΔ51 (n = 3) for 48 hr. Error bars, mean ± s.d. n = 3. **g**, Representative siRNA efficacy western blots for (f) are displayed. All panels: representative data from three independent experiments using biological replicates.

**Supplementary Figure 10** Expression of TNF $\alpha$  transgene from oncolytic viruses potentiates SMC-mediated cancer cell death further.

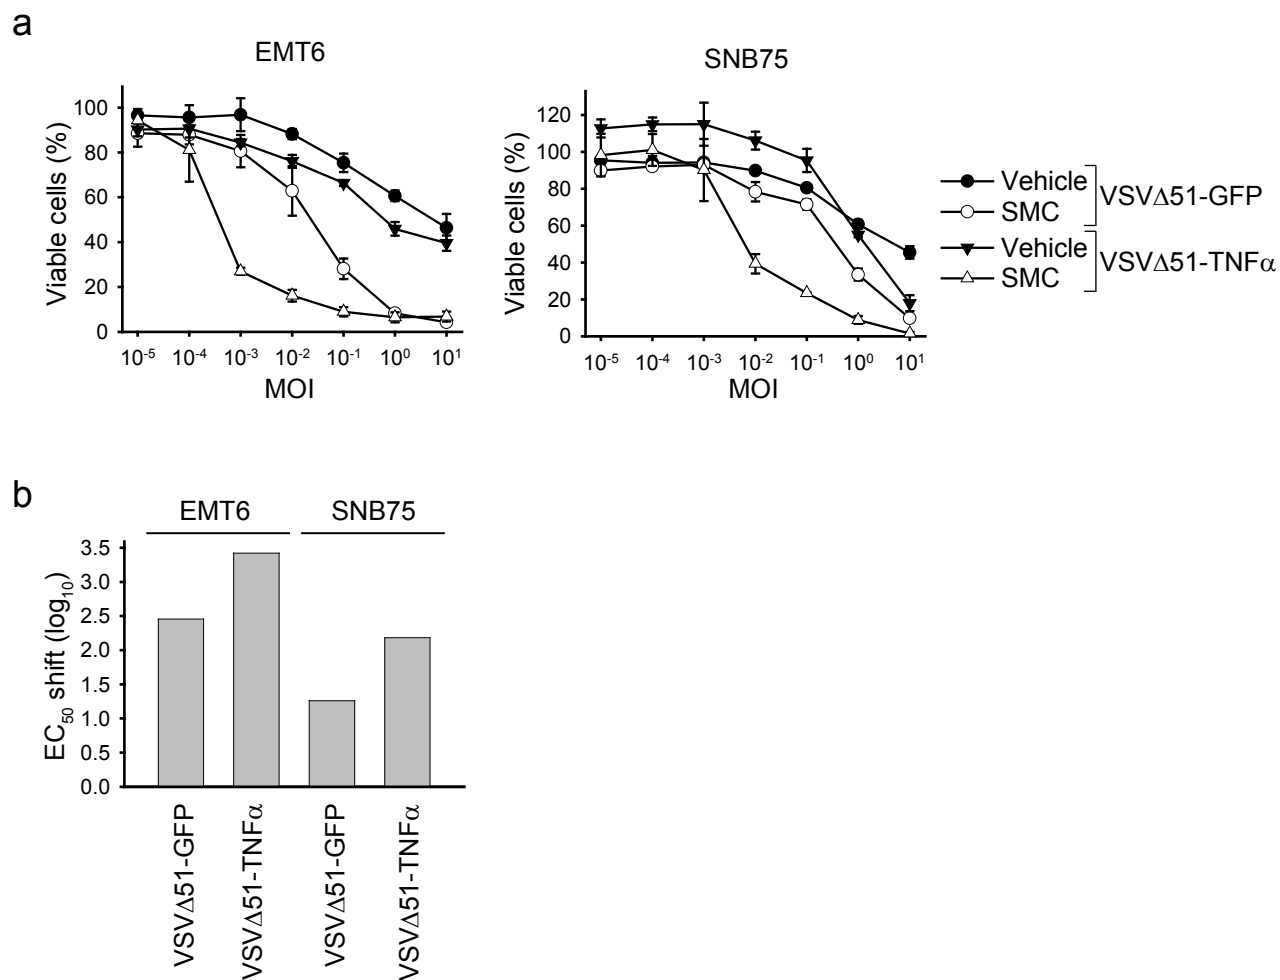

**a**, Alamar blue viability assay of cells cotreated with 5  $\mu$ M SMC and increasing MOIs of VSV $\Delta$ 51-GFP or VSV $\Delta$ 51-TNF $\alpha$  for 24 hr. Error bars, mean  $\pm$  s.d. **b**, Representative EC<sub>50</sub> shifts from (a). The dose required to yield 50% viable cells in the presence in SMC versus vehicle was determined using nonlinear regression and plotted as EC<sub>50</sub> shift. Representative data from three independent experiments using biological replicates (n = 3).

**Supplementary Figure 11** Oncolytic virus infection leads to enhanced TNF $\alpha$  expression upon SMC treatment.

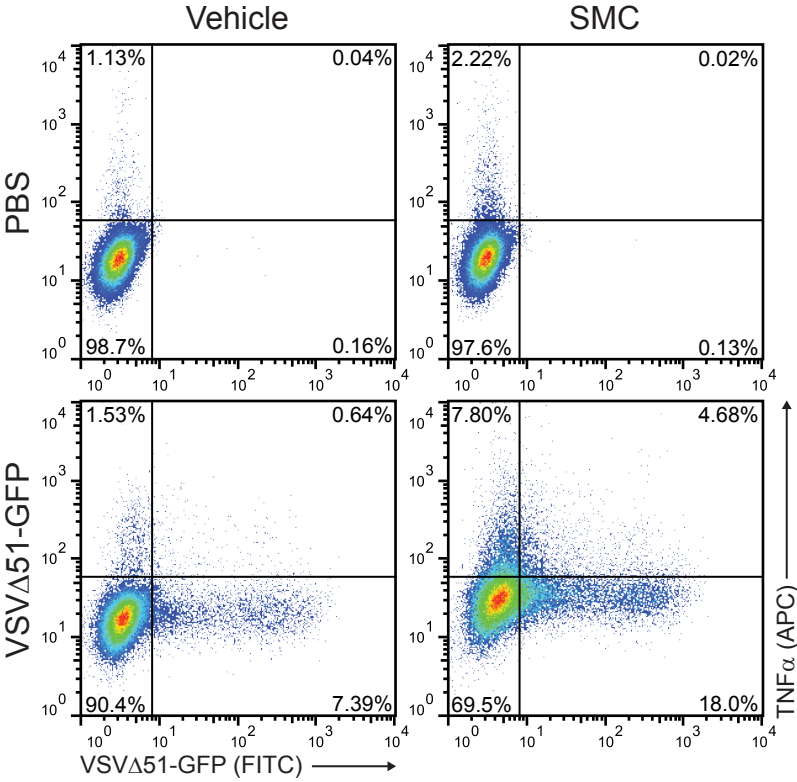

EMT6 cells were cotreated with 5  $\mu$ M SMC and 0.1 MOI VSV $\Delta$ 51-GFP for 20 hr, and cells were processed for the presence of intracellular TNF $\alpha$  via flow cytometry. Representative data from four independent experiments.

**Supplementary Figure 12** TNF $\alpha$  signalling is required for type I IFN induced synergy with SMC treatment.

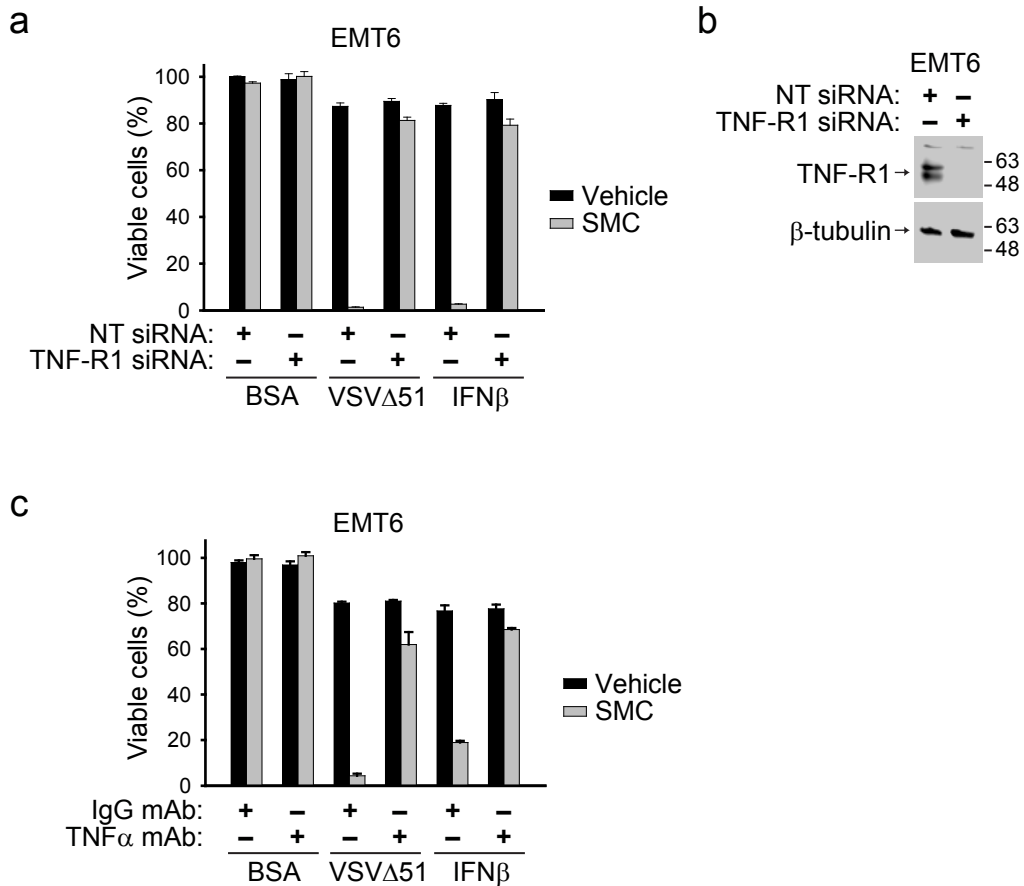

**a**, Alamar blue viability assay of EMT6 cells transfected with nontargeting (NT) or TNF-R1 siRNA for 48 hr and subsequently treated with 5  $\mu$ M LCL161 and VSV $\Delta$ 51 (0.1 MOI) or 250 U/mL IFN $\beta$  for 48 hr. Error bars, mean  $\pm$  s.d. **b**, Representative siRNA efficacy blot from (a). **c**, Viability of EMT6 cells that were pretreated with TNF $\alpha$  neutralizing antibodies for 2 hr and subsequently treated with 5  $\mu$ M LCL161 and 0.1 MOI of VSV $\Delta$ 51 or 250 U/mL of IFN $\beta$ . All panels: representative data from at least three independent experiments using biological replicates (n = 3).

**Supplementary Figure 13** SMC treatment causes minimal transient weight loss and leads to downregulation of cIAP1/2.

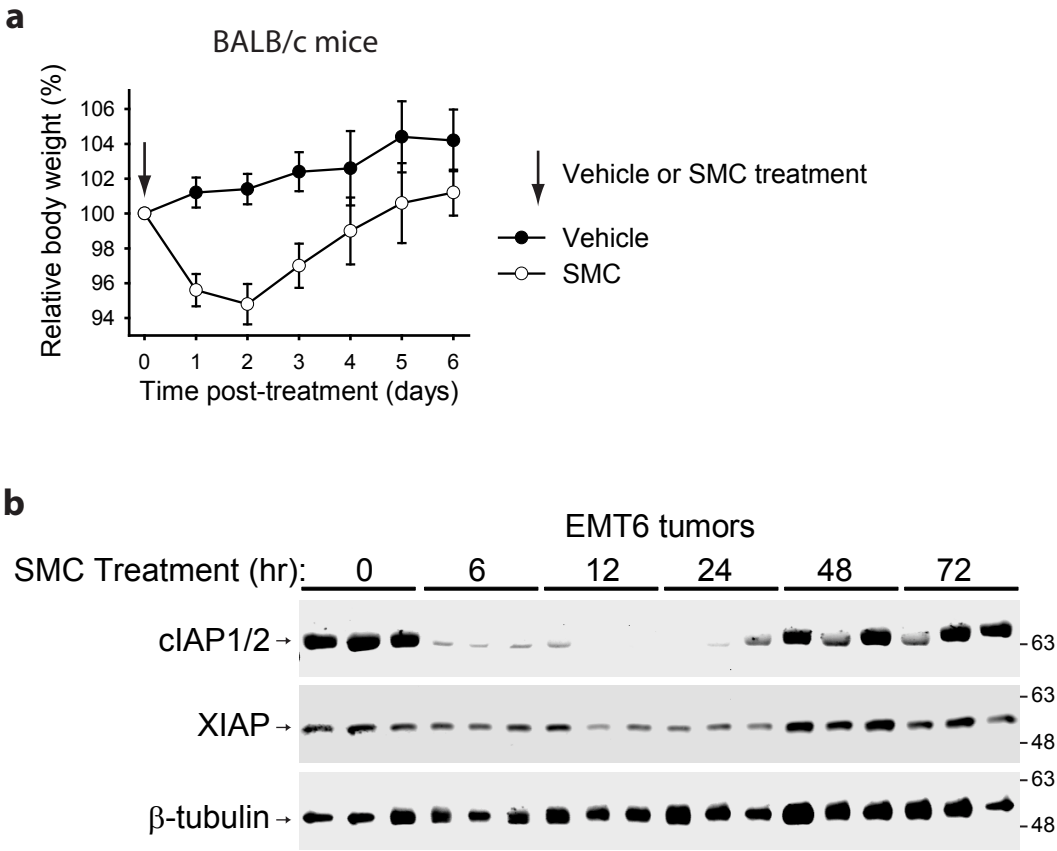

**a**, Weights from SMC treated mice female BALB/c mice (50 mg/kg LCL161, per os) were recorded after a single treatment (day 0). n = 5 per group. Error bars, mean  $\pm$  s.e.m. **b**, EMT6-tumour bearing mice were treated with 50 mg/kg LCL161 (per os) and tumours harvested at the indicated times for Western blotting using the indicated antibodies.

**Supplementary Figure 14** SMC treatment induces transient weight loss in a syngeneic mouse model of cancer.

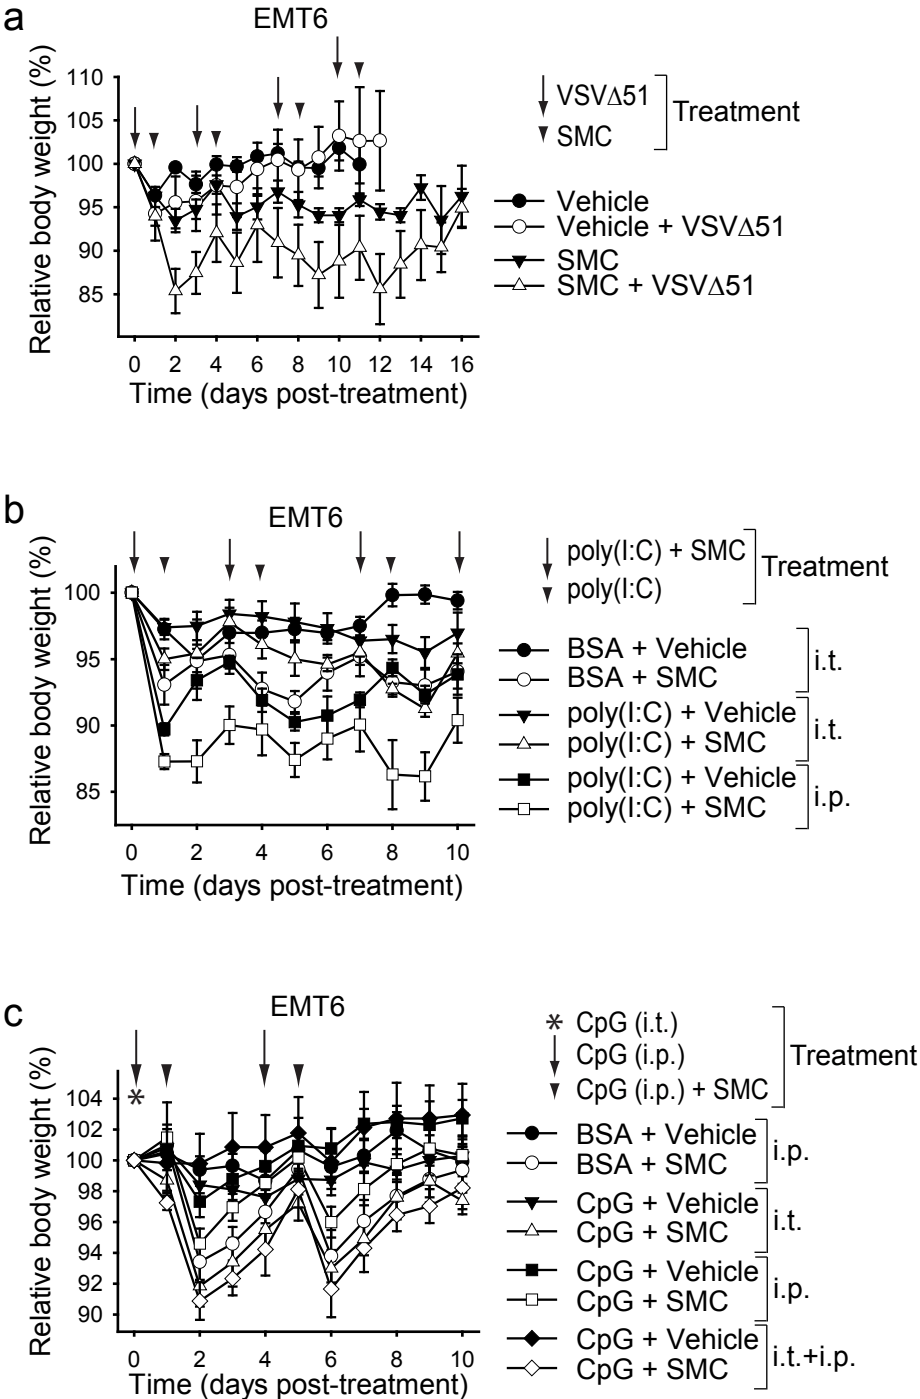

**a-c**, Measurement of mouse weights upon SMC and oncolytic VSV (a), poly(I:C) (b) or CpG (c) co-treatment in tumour-bearing animals from the experiments depicted in Fig. 4a, 5b, 5d, respectively. Error bars, mean  $\pm$  s.e.m.

**Supplementary Figure 15** VSV $\Delta$ 51-induced cell death in HT-29 cells is potentiated by SMC treatment in vitro and in vivo.

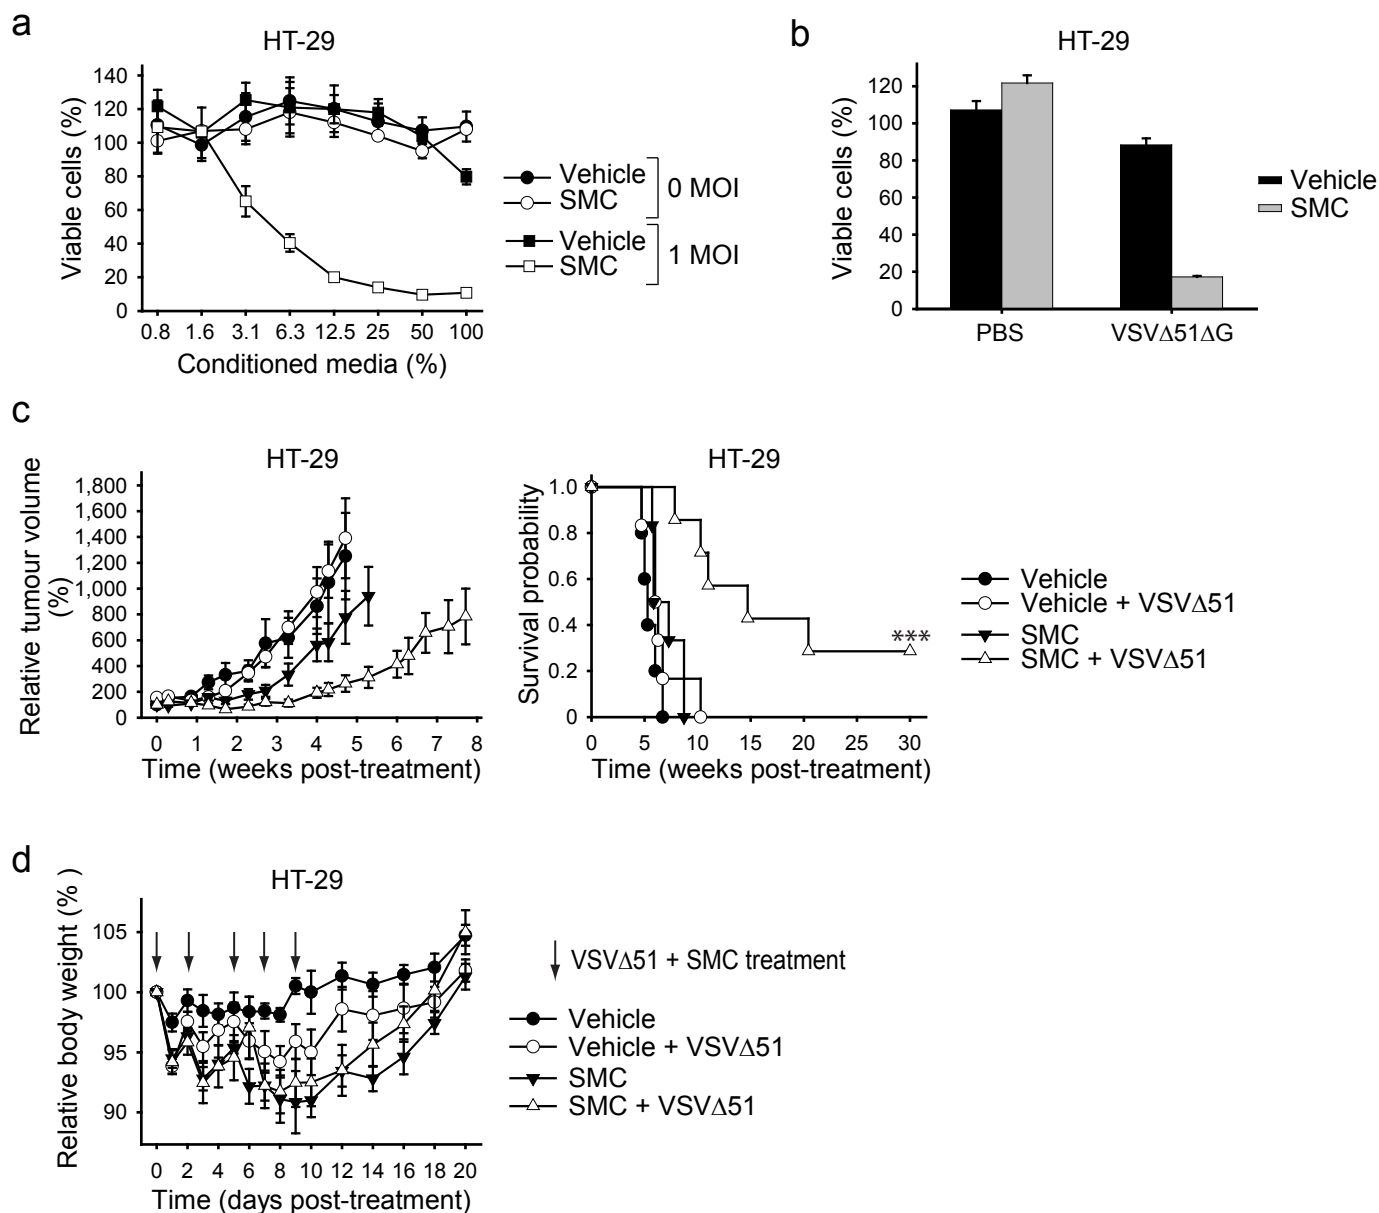

**a**, Cells were infected with VSV $\Delta$ 51 for 24 hr and the cell culture supernatant was exposed to UV light for 1 hr. The UV-inactivated supernatant was applied to new HT-29 cells at the indicated dose in the presence of 5  $\mu$ M LCL161 for 48 hr. Viability was ascertained by Alamar blue. Error bars, mean  $\pm$  s.d. Representative data from three independent experiments using biological replicates (n = 3). **b**, Alamar blue viability of cells cotreated with 5  $\mu$ M LCL161 and a non-spreading virus VSV $\Delta$ 51 $\Delta$ G (0.1 MOI). Error bars, mean  $\pm$  s.d. Representative data from three independent experiments using biological replicates (n = 3). **c**, CD-1 nude mice with established HT-29 tumours were treated with 50 mg/kg LCL161 (per os) and 1x10<sup>8</sup> PFU VSV $\Delta$ 51 (intratumoral). Vehicle, n = 5; vehicle + VSV $\Delta$ 51, n = 6; SMC, n = 6; SMC + VSV $\Delta$ 51, n = 7. Left panel depicts tumour growth relative to day 0 post-treatment. Right panel represents the Kaplan-Meier curve depicting mouse survival. Error bars, mean  $\pm$  s.e.m. Log-rank with Holm-Sidak multiple comparison: \*\*\*, p < 0.001 **d**, Measurement of mouse weights upon SMC and OV co-treatment in tumour-bearing animals from the experiment depicted in (c). Error bars, mean  $\pm$  s.e.m.

**Supplementary Figure 16** Type I IFN signalling is required for SMC and oncolytic virus synergy in vivo.

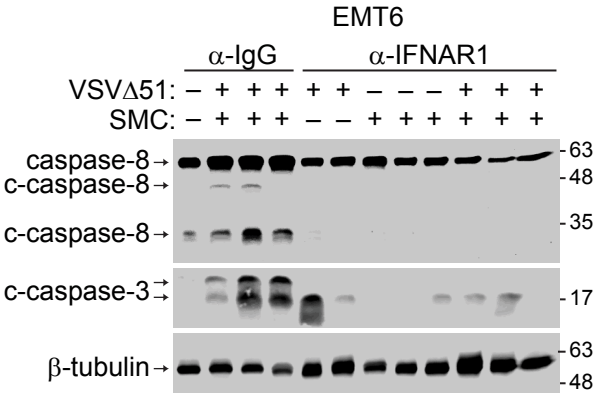

EMT6 tumour bearing mice were treated with vehicle or 50 mg/kg of the LCL161 for 4 hr, and subsequently treated with neutralizing IFNAR1 or isotype antibodies for 20 hr. Subsequently, animals were treated with PBS or VSVΔ51 (5x10<sup>8</sup> PFU) i.v. for 18 hr. Tumours were processed for Western blotting with the indicated antibodies.



**Supplementary Figure 17** Oncolytic virus infection of innate immune cells leads to cancer cell death in the presence of SMCs.

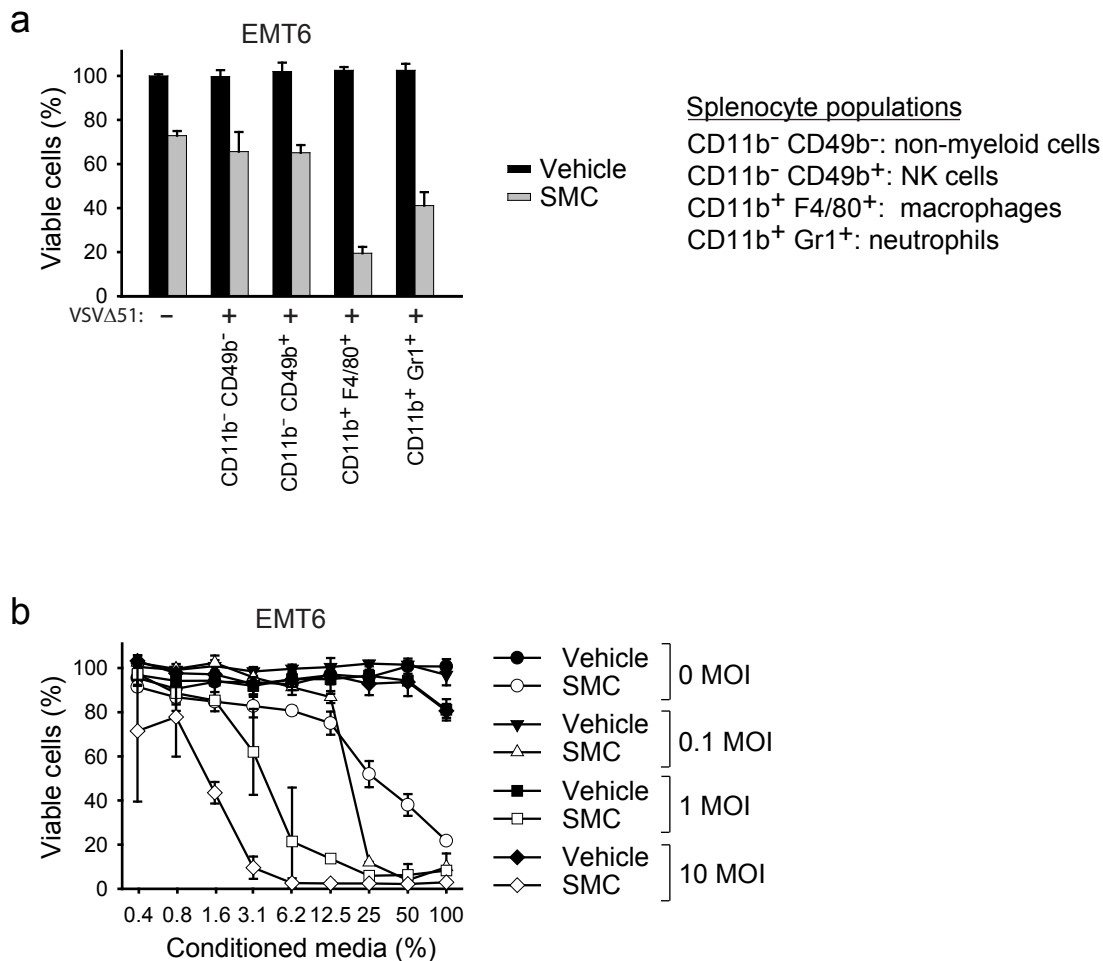

**a**, Immune subpopulations were sorted from splenocytes (CD11b<sup>+</sup> F4/80<sup>+</sup>: macrophage; CD11b<sup>+</sup> Gr1<sup>+</sup>: neutrophil; CD11b<sup>-</sup> CD49b<sup>+</sup>: NK cell; CD11b<sup>-</sup> CD49b<sup>-</sup>: non-myeloid cells) and were infected with 1 MOI of VSVΔ51 for 24 hr. Cell culture supernatants were applied to SMC-treated EMT6 cells for 24 hr and EMT6 viability was assessed by Alamar Blue. Error bars, mean ± s.d. **b**, Bone marrow derived macrophages were infected with VSVΔ51 and the supernatant was applied to EMT6 cells in the presence of 5 μM SMC, and viability was measured by Alamar blue. Error bars, mean ± s.d.

**Supplementary Figure 18** Schematic of oncolytic virus-induced type I IFN and SMC synergy in bystander cancer cell death.

**a**

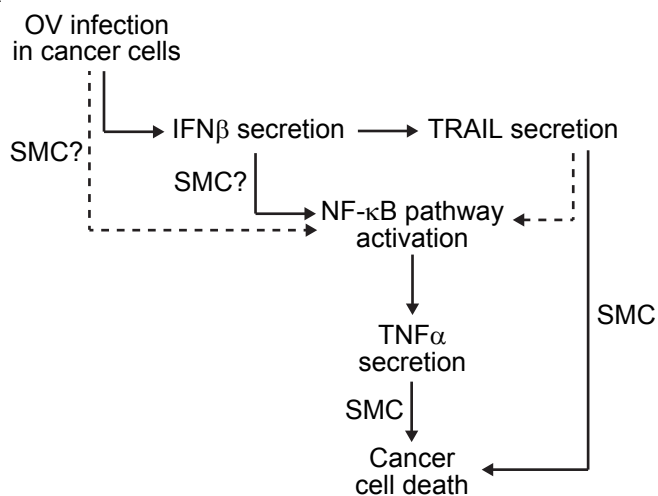

**b**

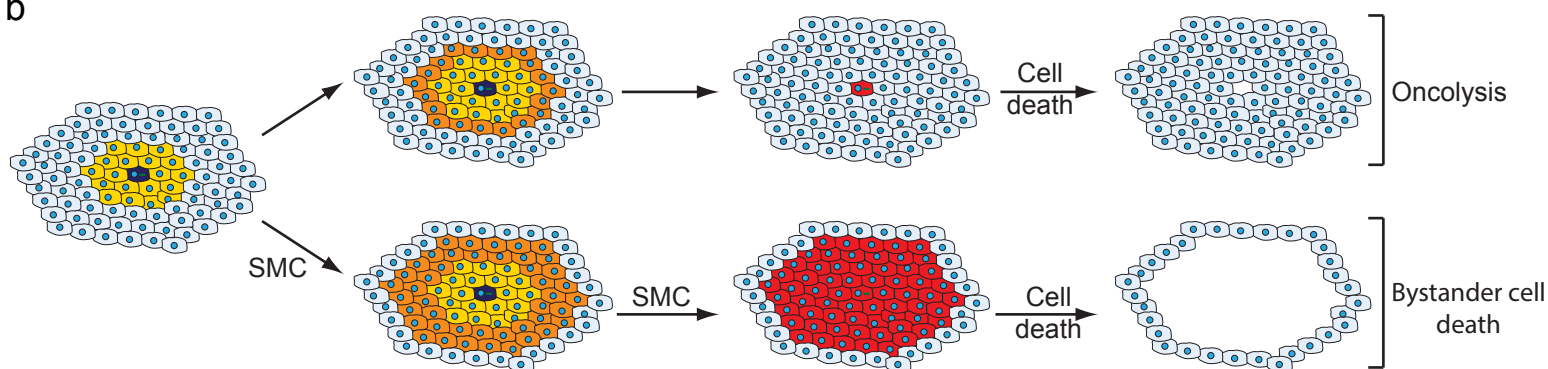

-  Virus-infected cell
-  Uninfected cell not exposed to cytokines
-  Spread of Type I IFNs
-  Spread of TNF $\alpha$  and TRAIL
-  Dead cells

**a**, Virus infection in refractory cancer cells leads to the production of Type 1 IFN, which subsequently induces expression of IFN stimulated genes such as TRAIL. Type 1 IFN stimulation also leads to the NF- $\kappa$ B-dependent production of TNF $\alpha$ . IAP antagonism by SMC treatment leads to upregulation of TNF $\alpha$  and TRAIL expression and apoptosis of neighbouring tumour cells. **b**, Infection of a single tumour cell results in the activation of innate antiviral Type 1 IFN pathway, leading to the secretion of Type 1 IFNs onto neighbouring cells. The neighbouring cells also produce the proinflammatory cytokines TNF $\alpha$  and TRAIL. The singly infected cell undergoes oncolysis and the remainder of the tumour mass remains intact. On the other hand, neighbouring cells undergo bystander cell death due upon SMC treatment as a result of the SMC-mediated upregulation of TNF $\alpha$ /TRAIL and promotion of apoptosis upon proinflammatory cytokine activation.

## Supplementary Figure 19 Full-length immunoblots

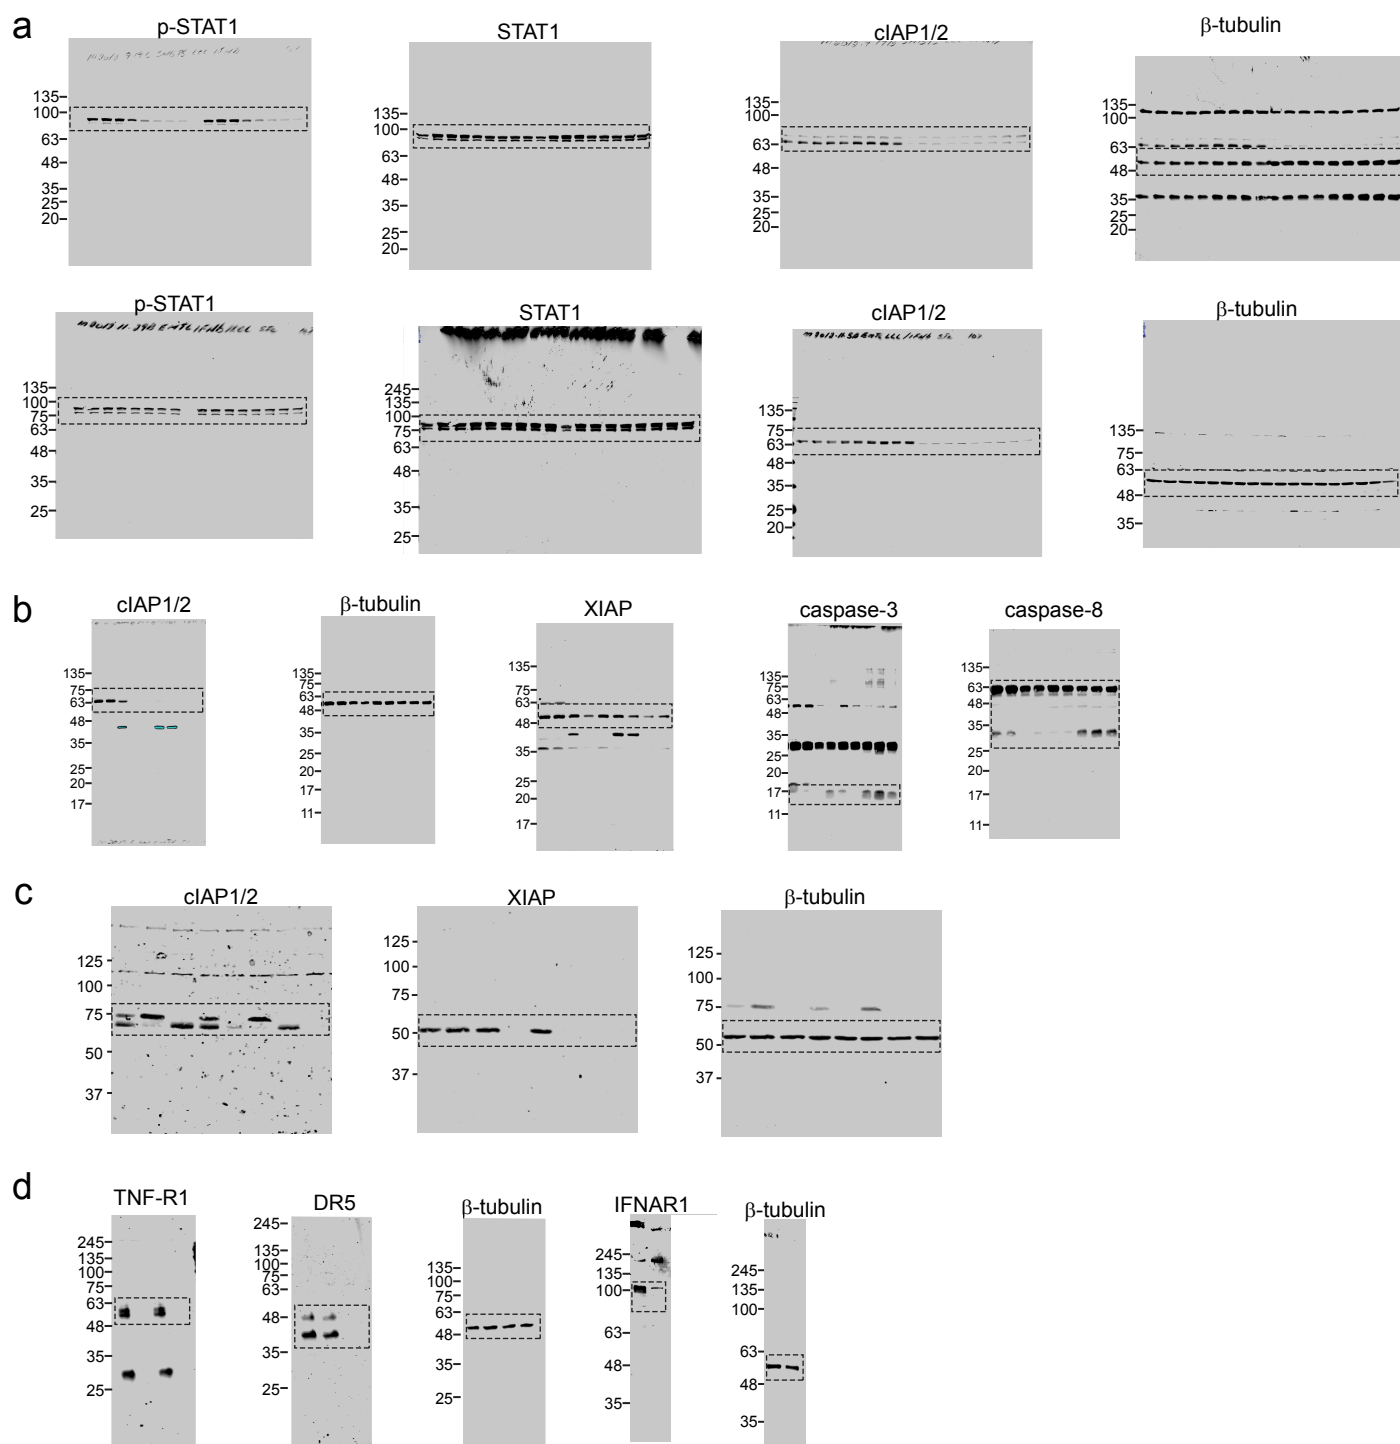

Full-length western blots pertaining to Fig. 2e (a), Fig. 4e (b), Supplementary Fig. 5b (c), Supplementary Fig. 8 (d), Supplementary Fig. 9a (e), Supplementary Fig. 9g (f), Supplementary Fig. 14 (g), Supplementary Fig. 12 (h) and Supplementary Fig. 17 (i).

Supplementary Figure 19 Full-length immunoblots

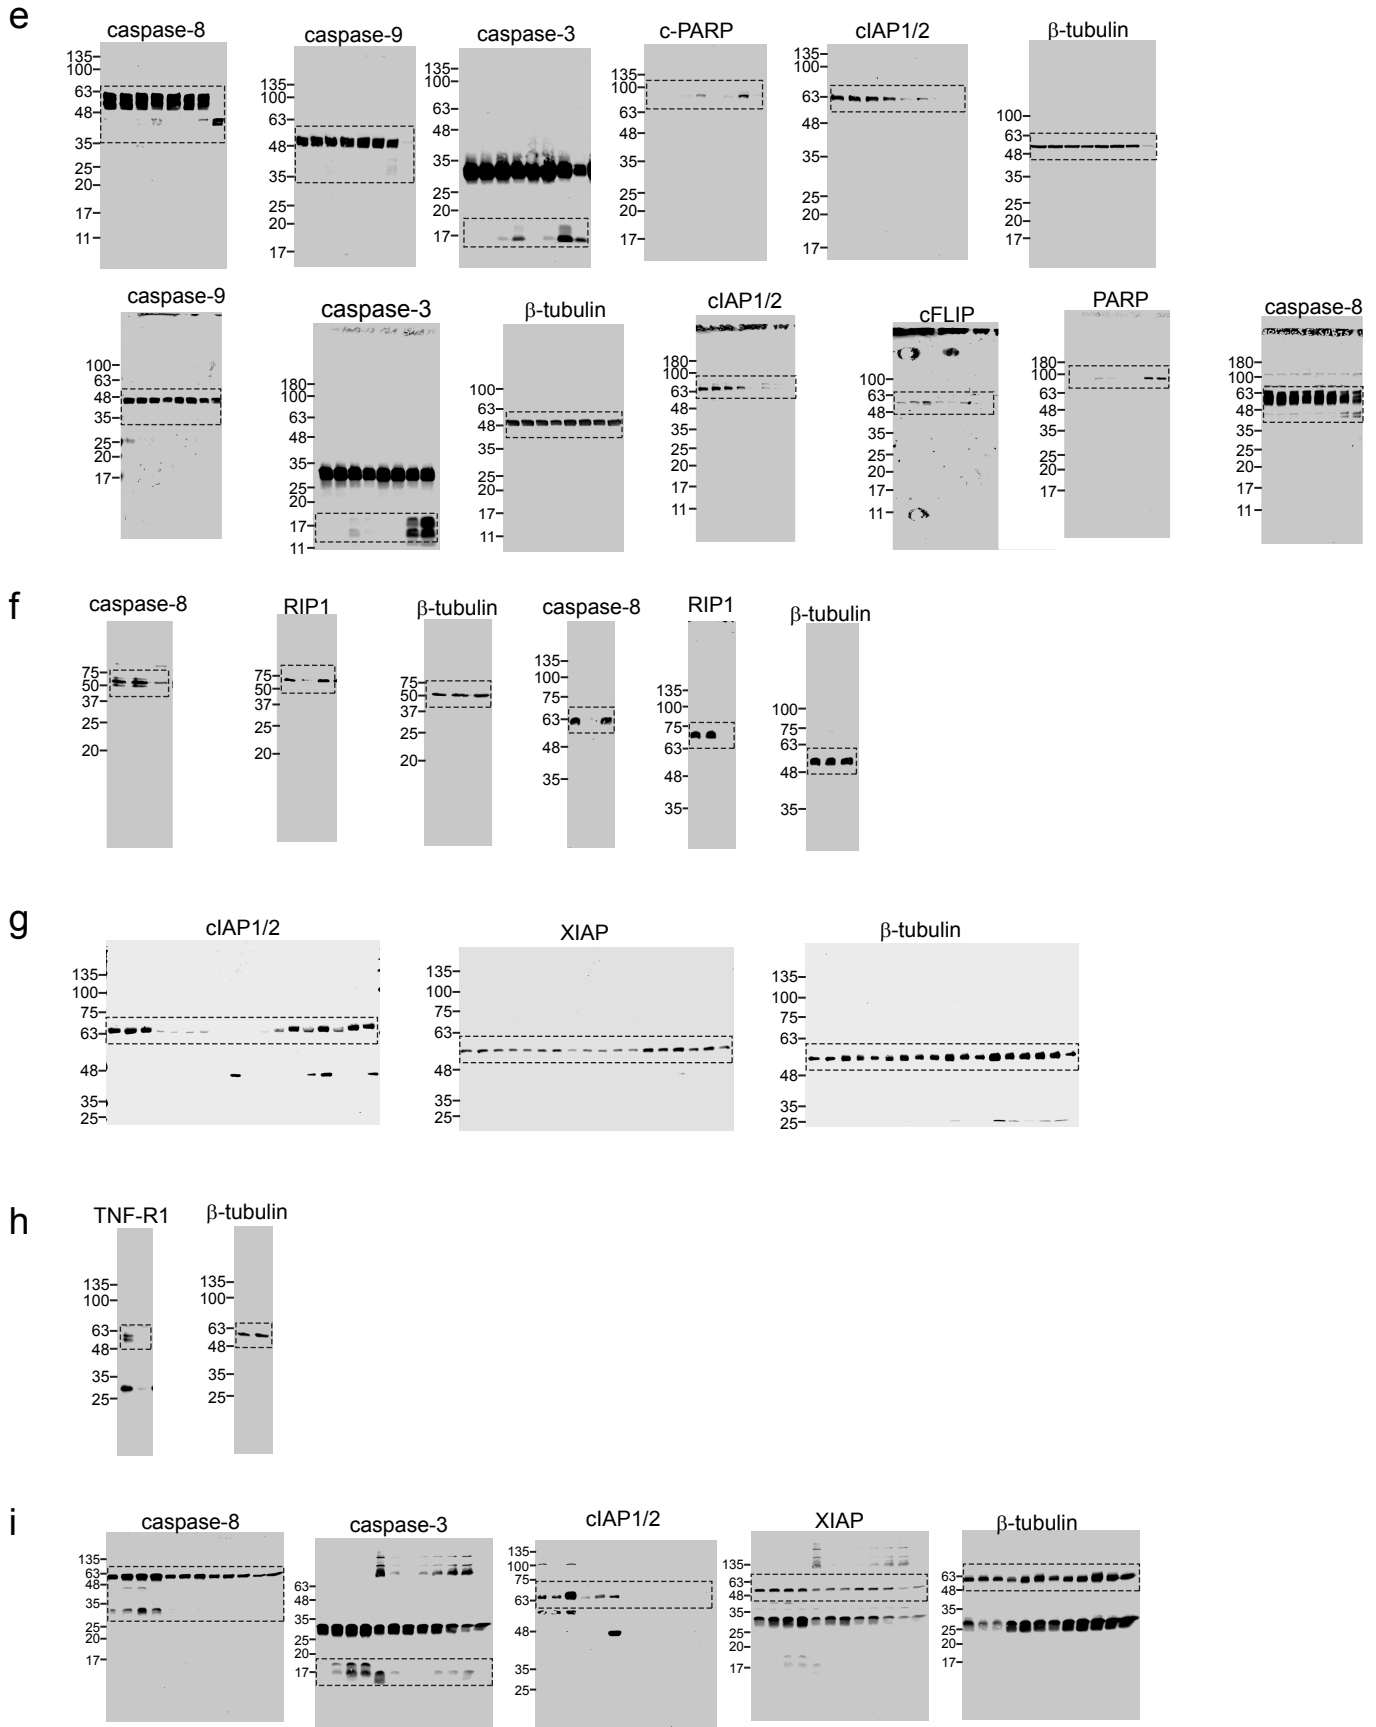

Full-length western blots pertaining to Fig. 2e (a), Fig. 4e (b), Supplementary Fig. 5b (c), Supplementary Fig. 8 (d), Supplementary Fig. 9a (e), Supplementary Fig. 9g (f), Supplementary Fig. 14 (g), Supplementary Fig. 12 (h) and Supplementary Fig. 17 (i).

**Supplementary Table 1** List of interferon-stimulated genes affected by VSV $\Delta$ 51 infection or IFN $\beta$  treatment in cancer cells. SNB75 cells were infected with 1 MOI of VSV $\Delta$ 51 or treated with 250 U/mL IFN $\beta$  for 24 hr, and the cells were processed for RT-qPCR with primers targeting indicated genes (Cytokine Libraries I and II from realtimeprimers.com).

| <u>VSV</u> | <u>IFN<math>\beta</math></u> | <u>Gene name</u> | <u>Gene ID</u>                                        |
|------------|------------------------------|------------------|-------------------------------------------------------|
| 25465.4    | 1017.8                       | CCL8             | Chemokine (C-C motif) ligand 8                        |
| 13388.9    | 44.9                         | IL29             | Interleukin 29 (interferon, lambda 1)                 |
| 5629.3     | 24.3                         | IFNB1            | Interferon, beta 1, fibroblast                        |
| 1526.8     | 16.2                         | TNFSF15          | Tumor necrosis factor (ligand) superfamily, member 15 |
| 847.0      | 24.6                         | CCL5             | Chemokine (C-C motif) ligand 5                        |
| 747.7      | 17.2                         | CCL3             | Chemokine (C-C motif) ligand 3                        |
| 650.9      | 60.6                         | TNFSF10          | Tumor necrosis factor (ligand) superfamily, member 10 |
| 421.3      | 296.1                        | IL12A            | Interleukin 12A                                       |
| 289.3      | 10.7                         | TNFSF18          | Tumor necrosis factor (ligand) superfamily, member 18 |
| 255.3      | 18.8                         | CCL7             | Chemokine (C-C motif) ligand 7                        |
| 154.2      | 19.2                         | IL6              | Interleukin 6 (interferon, beta 2)                    |
| 150.8      | 12.9                         | IL1RN            | Interleukin 1 receptor antagonist                     |
| 108.1      | 25.5                         | CCL20            | Chemokine (C-C motif) ligand 20                       |
| 78.6       | 6.2                          | CXCL1            | Chemokine (C-X-C motif) ligand 1                      |
| 64.7       | 14.8                         | CCL2             | Chemokine (C-C motif) ligand 2                        |
| 62.5       | 14.5                         | CCL4             | Chemokine (C-C motif) ligand 4                        |
| 55.6       | 1.2                          | CXCL3            | Chemokine (C-X-C motif) ligand 3                      |
| 55.2       | 4.3                          | TNF              | Tumor necrosis factor (TNF superfamily, member 2)     |
| 48.8       | 4.3                          | IGF1             | Insulin-like growth factor 1 (somatomedin C)          |
| 48.4       | 2.8                          | CXCL2            | Chemokine (C-X-C motif) ligand 2                      |
| 38.5       | 3.8                          | CCL11            | Chemokine (C-C motif) ligand 11                       |
| 37.5       | 3.8                          | HGF              | Hepatocyte growth factor                              |
| 36.5       | 75.1                         | NGFB             | Nerve growth factor, beta polypeptide                 |
| 32.9       | 4.0                          | FGF14            | Fibroblast growth factor 14                           |
| 24.7       | 25.6                         | FGF20            | Fibroblast growth factor 20                           |
| 21.5       | 16.4                         | IL1B             | Interleukin 1, beta                                   |
| 20.0       | 36.3                         | CSF2             | Colony stimulating factor 2 (granulocyte-macrophage)  |
| 18.3       | 2.6                          | GDF3             | Growth differentiation factor 3                       |
| 17.2       | 2.0                          | CCL28            | Chemokine (C-C motif) ligand 28                       |
| 12.0       | 2.1                          | CCL22            | Chemokine (C-C motif) ligand 22                       |
| 11.3       | 2.5                          | CCL17            | Chemokine (C-C motif) ligand 17                       |
| 10.5       | 2.0                          | CCL13            | Chemokine (C-C motif) ligand 13                       |
| 10.5       | 15.3                         | IL20             | Interleukin 20                                        |
| 9.7        | 22.8                         | FGF16            | Fibroblast growth factor 16                           |
| 8.8        | 3.6                          | TNFSF14          | Tumor necrosis factor (ligand) superfamily, member 14 |
| 8.2        | 2.7                          | FGF2             | Fibroblast growth factor 2 (basic)                    |
| 7.1        | 8.1                          | BDNF             | Brain-derived neurotrophic factor                     |

|     |      |        |                                                      |
|-----|------|--------|------------------------------------------------------|
| 7.1 | 9.7  | IL1A   | Interleukin 1, alpha                                 |
| 7.1 | 10.9 | ANGPT4 | Angiopoietin 4                                       |
| 7.0 | 1.5  | TGFB3  | Transforming growth factor, beta 3                   |
| 7.0 | 5.8  | IL22   | Interleukin 22                                       |
| 6.9 | 9.7  | IL1F5  | Interleukin 1 family, member 5 (delta)               |
| 6.7 | 2.4  | IFNW1  | Interferon, omega 1                                  |
| 6.6 | 12.6 | IL11   | Interleukin 11                                       |
| 6.6 | 25.1 | IL1F8  | Interleukin 1 family, member 8 (eta)                 |
| 6.3 | -1.3 | EDA    | Ectodysplasin A                                      |
| 5.9 | 8.0  | FGF5   | Fibroblast growth factor 5                           |
| 5.8 | 5.0  | VEGFC  | Vascular endothelial growth factor C                 |
| 5.2 | 4.9  | LIF    | Leukemia inhibitory factor                           |
| 5.0 | 1.3  | CCL25  | Chemokine (C-C motif) ligand 25                      |
| 4.9 | 8.3  | BMP3   | Bone morphogenetic protein 3                         |
| 4.9 | 1.6  | IL17C  | Interleukin 17C                                      |
| 4.8 | -2.3 | TNFSF7 | CD70 molecule                                        |
| 4.3 | 2.5  | TNFSF8 | Tumor necrosis factor (ligand) superfamily, member 8 |
| 4.3 | 2.5  | FASLG  | Fas ligand (TNF superfamily, member 6)               |
| 4.2 | 2.7  | BMP8B  | Bone morphogenetic protein 8b                        |
| 4.2 | 6.0  | IL7    | Interleukin 7                                        |
| 4.1 | 5.2  | CCL24  | Chemokine (C-C motif) ligand 24                      |
| 4.0 | -2.2 | INHBE  | Inhibin, beta E                                      |
| 4.0 | 5.8  | IL23A  | Interleukin 23, alpha subunit p19                    |
| 3.8 | -1.1 | IL17F  | Interleukin 17F                                      |
| 3.7 | 2.9  | CCL21  | Chemokine (C-C motif) ligand 21                      |
| 3.5 | 8.5  | CSF1   | Colony stimulating factor 1 (macrophage)             |
| 3.5 | 3.0  | IL15   | Interleukin 15                                       |
| 3.4 | 5.7  | NRG2   | Neuregulin 2                                         |
| 3.3 | N/A  | INHBB  | Inhibin, beta B                                      |
| 3.3 | N/A  | LTB    | Lymphotoxin beta (TNF superfamily, member 3)         |
| 3.3 | N/A  | BMP7   | Bone morphogenetic protein 7                         |
| 3.0 | -3.8 | IL1F9  | Interleukin 1 family, member 9                       |
| 2.9 | 6.1  | IL12B  | Interleukin 12B                                      |
| 2.8 | 6.2  | FLT3LG | Fms-related tyrosine kinase 3 ligand                 |
| 2.7 | 3.0  | FGF1   | Fibroblast growth factor 1 (acidic)                  |
| 2.5 | -2.0 | CXCL13 | Chemokine (C-X-C motif) ligand 13                    |
| 2.4 | 2.2  | IL17B  | Interleukin 17B                                      |
| 2.3 | 7.8  | GDNF   | Glial cell derived neurotrophic factor               |
| 2.3 | -1.7 | GDF7   | Growth differentiation factor 7                      |
| 2.3 | -2.4 | LTA    | Lymphotoxin alpha (TNF superfamily, member 1)        |
| 2.2 | 1.7  | LEFTY2 | Left-right determination factor 2                    |
| 2.1 | 5.0  | FGF19  | Fibroblast growth factor 19                          |
| 2.1 | 9.8  | FGF23  | Fibroblast growth factor 23                          |
| 2.1 | 4.8  | CLC    | Cardiotrophin-like cytokine factor 1                 |

|      |             |          |                                                        |
|------|-------------|----------|--------------------------------------------------------|
| 2.1  | <b>3.0</b>  | ANGPT1   | Angiopoietin 1                                         |
| 2.0  | <b>10.6</b> | TPO      | Thyroid peroxidase                                     |
| 2.0  | 2.1         | EFNA5    | Ephrin-A5                                              |
| 1.9  | <b>6.4</b>  | IL1F10   | Interleukin 1 family, member 10 (theta)                |
| 1.9  | <b>7.6</b>  | LEP      | Leptin (obesity homolog, mouse)                        |
| 1.8  | <b>3.0</b>  | IL5      | Interleukin 5 (colony-stimulating factor, eosinophil)  |
| 1.8  | <b>5.7</b>  | IFNE1    | Interferon epsilon 1                                   |
| 1.8  | 2.7         | EGF      | Epidermal growth factor (beta-urogastrone)             |
| 1.7  | <b>3.4</b>  | CTF1     | Cardiotrophin 1                                        |
| 1.7  | -1.9        | BMP2     | Bone morphogenetic protein 2                           |
| 1.7  | 3.0         | EFNB2    | Ephrin-B2                                              |
| 1.6  | 1.0         | FGF8     | Fibroblast growth factor 8 (androgen-induced)          |
| 1.6  | -2.0        | TGFB2    | Transforming growth factor, beta 2                     |
| 1.5  | -1.6        | BMP8A    | Bone morphogenetic protein 8a                          |
| 1.5  | <b>3.3</b>  | NTF5     | Neurotrophin 5 (neurotrophin 4/5)                      |
| 1.5  | 1.0         | GDF10    | Growth differentiation factor 10                       |
| 1.5  | 1.5         | TNFSF13B | Tumor necrosis factor (ligand) superfamily, member 13b |
| 1.5  | 2.5         | IFNA1    | Interferon, alpha 1                                    |
| 1.4  | -1.3        | INHBC    | Inhibin, beta C                                        |
| 1.4  | 2.8         | FGF7     | Galactokinase 2                                        |
| 1.4  | <b>3.3</b>  | IL24     | Interleukin 24                                         |
| 1.4  | -1.1        | CCL27    | Chemokine (C-C motif) ligand 27                        |
| 1.3  | 1.9         | FGF13    | Fibroblast growth factor 13                            |
| 1.3  | 1.4         | IFNK     | Interferon, kappa                                      |
| 1.3  | 2.0         | ANGPT2   | Angiopoietin 2                                         |
| 1.3  | <b>7.6</b>  | IL18     | Interleukin 18 (interferon-gamma-inducing factor)      |
| 1.3  | <b>7.0</b>  | NRG1     | Neuregulin 1                                           |
| 1.3  | <b>4.9</b>  | NTF3     | Neurotrophin 3                                         |
| 1.2  | <b>15.0</b> | FGF10    | Fibroblast growth factor 10                            |
| 1.2  | 1.9         | KITLG    | KIT ligand                                             |
| 1.2  | -1.3        | IL17D    | Interleukin 17D                                        |
| 1.2  | 1.1         | TNFSF4   | Tumor necrosis factor (ligand) superfamily, member 4   |
| 1.2  | 1.3         | VEGFA    | Vascular endothelial growth factor                     |
| 1.1  | 2.4         | FGF11    | Fibroblast growth factor 11                            |
| 1.1  | -1.4        | IL17E    | Interleukin 17E                                        |
| 1.1  | -2.1        | TGFB1    | Transforming growth factor, beta 1                     |
| 1.0  | <b>3.1</b>  | GH1      | Growth hormone 1                                       |
| -1.0 | <b>6.1</b>  | IL9      | Interleukin 9                                          |
| -1.0 | -2.5        | EFNB3    | Ephrin-B3                                              |
| -1.0 | 1.8         | VEGFB    | Vascular endothelial growth factor B                   |
| -1.0 | -1.2        | IL1F7    | Interleukin 1 family, member 7 (zeta)                  |
| -1.0 | -2.1        | GDF11    | Growth differentiation factor 11                       |
| -1.1 | 1.3         | ZFP91    | Zinc finger protein 91 homolog (mouse)                 |
| -1.2 | -1.1        | BMP6     | Bone morphogenetic protein 6                           |

|      |            |        |                                                     |
|------|------------|--------|-----------------------------------------------------|
| -1.2 | -1.2       | AMH    | Anti-Mullerian hormone                              |
| -1.3 | -1.0       | LEFTY1 | Left-right determination factor 1                   |
| -1.3 | 2.4        | EFNA3  | Ephrin-A3                                           |
| -1.3 | -1.3       | LASS1  | LAG1 longevity assurance homolog 1                  |
| -1.5 | 1.0        | EFNA4  | Ephrin-A4                                           |
| -1.8 | 1.3        | PDGFD  | DNA-damage inducible protein 1                      |
| -1.8 | 1.8        | IL10   | Interleukin 10                                      |
| -1.9 | 1.6        | GDF5   | Growth differentiation factor 5                     |
| -1.9 | 1.3        | EFNA2  | Ephrin-A2                                           |
| -1.9 | -1.5       | EFNB1  | Ephrin-B1                                           |
| -1.9 | -1.4       | GDF8   | Growth differentiation factor 8                     |
| -1.9 | 1.6        | PDGFC  | Platelet derived growth factor C                    |
| -2.2 | 2.4        | TSLP   | Thymic stromal lymphopoietin                        |
| -2.3 | -1.5       | BMP10  | Bone morphogenetic protein 10                       |
| -2.4 | -4.6       | CXCL12 | Chemokine (C-X-C motif) ligand 12                   |
| -2.5 | <b>4.0</b> | IFNG   | Interferon, gamma                                   |
| -2.6 | 1.2        | EPO    | Erythropoietin                                      |
| -2.7 | -2.1       | GAS6   | Growth arrest-specific 6                            |
| -2.9 | 2.9        | PRL    | Prolactin                                           |
| -2.9 | -2.1       | BMP4   | Bone morphogenetic protein 4                        |
| -2.9 | -5.7       | INHA   | Inhibin, alpha                                      |
| -3.0 | -1.3       | GDF9   | Growth differentiation factor 9                     |
| -3.1 | -1.5       | FGF18  | Fibroblast growth factor 18                         |
| -3.2 | N/A        | IL17   | Interleukin 17                                      |
| -3.2 | -1.1       | IL26   | Interleukin 26                                      |
| -3.4 | 1.2        | EFNA1  | Ephrin-A1                                           |
| -3.8 | -1.1       | FGF12  | Fibroblast growth factor 12                         |
| -4.0 | -2.3       | FGF9   | Fibroblast growth factor 9 (glia-activating factor) |
| -4.5 | 1.4        | CCL26  | Chemokine (C-C motif) ligand 26                     |
| -8.0 | <b>9.7</b> | CCL19  | Chemokine (C-C motif) ligand 19                     |
| N/A  | N/A        | BMP15  | Bone morphogenetic protein 15                       |
| N/A  | N/A        | CCL15  | Chemokine (C-C motif) ligand 14                     |
| N/A  | N/A        | CCL16  | Chemokine (C-C motif) ligand 16                     |
| N/A  | N/A        | CCL18  | Chemokine (C-C motif) ligand 18                     |
| N/A  | N/A        | CCL23  | Chemokine (C-C motif) ligand 23                     |
| N/A  | N/A        | CD40LG | CD40 ligand (TNF superfamily)                       |
| N/A  | N/A        | CSF3   | Colony stimulating factor 3 (granulocyte)           |
| N/A  | N/A        | CXCL5  | Chemokine (C-X-C motif) ligand 5                    |
| N/A  | N/A        | FGF4   | Fibroblast growth factor 4                          |
| N/A  | N/A        | FGF6   | Fibroblast growth factor 6                          |
| N/A  | N/A        | GH2    | Growth hormone 2                                    |
| N/A  | N/A        | IL2    | Interleukin 2                                       |
| N/A  | N/A        | IL21   | Interleukin 21                                      |
| N/A  | N/A        | IL28A  | Interleukin 28A (interferon, lambda 2)              |



|     |            |         |                                                       |
|-----|------------|---------|-------------------------------------------------------|
| N/A | N/A        | INHBA   | Inhibin, beta A                                       |
| N/A | N/A        | NRG3    | Neuregulin 3                                          |
| N/A | N/A        | TNFSF11 | Tumor necrosis factor (ligand) superfamily, member 11 |
| N/A | N/A        | TNFSF13 | Tumor necrosis factor (ligand) superfamily, member 13 |
| N/A | <b>6.5</b> | NRG4    | Neuregulin 4                                          |
| N/A | <b>6.1</b> | IL3     | Interleukin 3 (colony-stimulating factor, multiple)   |
| N/A | 1.8        | TNFSF9  | Tumor necrosis factor (ligand) superfamily, member 9  |

Total cytokines and chemokines from the cytokine library = 176

Number of genes with > 3-fold upregulation compared to control

VSVΔ51: 69

IFNβ: 70

Overlap: 44

**Supplementary Table 2** Catalogue numbers of primers used for RT-qPCR. Primers were obtained from realtimeprimers.com.

| <u>Catalogue</u>   | <u>Species</u> | <u>Gene</u>                        |
|--------------------|----------------|------------------------------------|
| MHK-1              | Mouse          | Mouse Housekeeping Gene Primer Set |
| VMPS-3027          | Mouse          | IFN $\beta$                        |
| VMPS-3154          | Mouse          | IRF1                               |
| VMPS-3157          | Mouse          | IRF3                               |
| CMPS-1 (Mm.3233)   | Mouse          | IRF7                               |
| VMPS-4035          | Mouse          | MX1                                |
| VMPS-4036          | Mouse          | MX2                                |
| VMPS-3019          | Mouse          | IFIT1                              |
| CMPS-1 (Mm.233471) | Mouse          | OAS1                               |
| CMPS-1 (Mm.228363) | Mouse          | OASL                               |
| HHK-1              | Human          | Human Housekeeping Gene Primer Set |
| VHPS-4476          | Human          | IFN $\beta$                        |
| VHPS-4626          | Human          | IRF1                               |
| VHPS-4629          | Human          | IRF3                               |
| CHPS-1 (Hs.166120) | Human          | IRF7                               |
| VHPS-5959          | Human          | MX1                                |
| VHPS-5960          | Human          | MX2                                |
| VHPS-4465          | Human          | IFIT1                              |
| VHPS-6421          | Human          | OAS1                               |
| VHPS-6424          | Human          | OASL                               |
| VHPS-9415          | Human          | TNF $\alpha$                       |
| VHPS-9439          | Human          | TRAIL                              |
| VHPS-4531          | Human          | IL1 $\beta$                        |
